## REVIEW

# Trithorax and Polycomb group-dependent regulation: a tale of opposing activities

Sarah J. Geisler<sup>1</sup> and Renato Paro<sup>1,2,\*</sup>

## ABSTRACT

Intricate layers of regulation determine the unique gene expression profiles of a given cell and, therefore, underlie the immense phenotypic diversity observed among cell types. Understanding the mechanisms that govern which genes are expressed and which genes are silenced is a fundamental focus in biology. The Polycomb and Trithorax group chromatin proteins play important roles promoting the stable and heritable repression and activation of gene expression, respectively. These proteins, which are conserved across metazoans, modulate post-translational modifications on histone tails and regulate nucleosomal structures. Here, we review recent advances that have shed light on the mechanisms by which these two classes of proteins act to maintain epigenetic memory and allow dynamic switches in gene expression during development.

**KEY WORDS:** Chromatin, Epigenetics, Polycomb group, Transcriptional memory, Trithorax group

## Introduction

Just as our understanding of personal identity is rooted in our memories, cellular identity is likewise grounded in transcriptional memory. It is essential for cells to remember gene expression states in order to maintain the cell fate decisions made throughout the course of development. Seminal work in *Drosophila melanogaster* has shown that an exquisitely regulated cascade of transiently expressed transcription factors establishes initial gene expression patterns. Subsequently, these expression states are maintained or remembered by epigenetic cellular memory systems. Polycomb group (PcG) proteins and Trithorax group (TrxG) proteins are vital for these stable and heritable gene expression patterns (Steffen and Ringrose, 2014). PcG proteins generally maintain gene repression, whereas TrxG proteins maintain the active expression state of their target genes. Although, on the surface, this might seem straightforward, a complex interplay between these two counteracting systems is more often observed. Indeed, a number of genes must maintain the ability to respond to new signals and change their activation state, and mechanisms that allow switching between PcG and TrxG action are thus built into the system. In this way, stable gene expression states that still allow for dynamic changes can be achieved.

In recent years, a number of exciting studies have provided valuable insight into this antagonistic relationship. Given the fundamental importance of TrxG and PcG regulation during embryogenesis and growth, many of these studies have been carried

out in a developmentally relevant context and potentially shed light on the mechanisms governing cell fate choices. Moreover, with the repertoire of TrxG and PcG targets continually expanding, understanding the interplay between these systems is not only informative for developmental biology but is also of interest for furthering our understanding of general gene expression regulation. Likewise, these topics converge upon hot areas of research in chromatin biology, such as the roles of long noncoding RNAs (lncRNAs) in regulating gene expression and how bivalent domains influence promoters. Additionally, with abrogation in the balance between TrxG-dependent activation and PcG-dependent repression implicated in disease states, it is important to have a better grasp on how these counteracting systems interrelate.

In this Review, we highlight the recent advances made in understanding the dynamic interplay between PcG and TrxG activities. While a brief overview of the PcG and TrxG systems will be provided, more detailed descriptions of these proteins can be found in a number of recent reviews (Di Croce and Helin, 2013; Grossniklaus and Paro, 2014; Kingston and Tamkun, 2014; Schwartz and Pirrotta, 2013; Simon and Kingston, 2013; Steffen and Ringrose, 2014). Our efforts will instead concentrate on how TrxG-dependent gene activation is achieved by overcoming PcG silencing at epigenetic switches in a variety of metazoan organisms and contexts.

## An overview of PcG and TrxG proteins

PcG and TrxG proteins were initially isolated in *Drosophila* as factors involved in maintaining the expression patterns of HOX genes (Grossniklaus and Paro, 2014; Steffen and Ringrose, 2014), which encode transcription factors that are important determinants of patterning. The spatially restricted expression of HOX genes across metazoans underlies the specification of the anterior-posterior body axis. Early studies using homeotic transformations in flies as readouts for the aberrant expression of HOX genes enabled identification of the trans-acting factors required for mediating transcriptional memory. Indeed, the gene encoding the founding member and namesake of the PcG proteins, *Polycomb*, was named based on the phenotype of its heterozygous mutant, which displayed additional sex combs (Grossniklaus and Paro, 2014; Lewis, 1978). Within this framework, two classes of counteracting regulatory systems were discovered: those that were required for maintaining the active state of a gene belonged to the TrxG class, and those necessary for maintaining repression fell into the PcG class. This paradigm of HOX gene regulation has since provided the foundation for our understanding of PcG and TrxG function in metazoans (Grossniklaus and Paro, 2014; Steffen and Ringrose, 2014).

The roles of PcG and TrxG complexes have arguably been studied at the functional level most extensively in flies. Thus, for simplicity, our discussion of PcG/TrxG components will be from a *Drosophila* standpoint. Homologous complexes have been

<sup>1</sup>Department of Biosystems Science and Engineering, ETH Zurich, Mattenstrasse 26, Basel 4058, Switzerland. <sup>2</sup>Faculty of Science, University of Basel, Klingelbergstrasse 50, Basel 4056, Switzerland.

\*Author for correspondence (renato.paro@bsse.ethz.ch)

This is an Open Access article distributed under the terms of the Creative Commons Attribution License (<http://creativecommons.org/licenses/by/3.0/>), which permits unrestricted use, distribution and reproduction in any medium provided that the original work is properly attributed.

identified in vertebrate and mammalian systems (Table 1); however, the repertoire of factors is more complex, with a number of variant complexes resulting from apparent amplifications within the pathways (Di Croce and Helin, 2013; Schwartz and Pirrotta, 2013).

**PcG complexes**

PcG proteins form distinct complexes (Table 1) containing subunits that harbor specific biochemical activities (Di Croce and Helin, 2013; Grossniklaus and Paro, 2014; Schwartz and Pirrotta, 2013). Notably Polycomb repressive complex 1 (PRC1) and Polycomb repressive complex 2 (PRC2) are conserved amongst metazoans and monoubiquitylate and di- and trimethylate specific lysine residues on H2A and H3, respectively (Table 1). A third grouping of PcG complexes that contains Pleiohomeotic (Pho) is also present in *Drosophila*.

PRC1 is composed of the core components Polycomb (Pc), Polyhomeotic (Ph), Posterior sex combs (Psc) and Sex combs extra (Sce, also known as dRing1) (Table 1) (Di Croce and Helin, 2013; Schwartz and Pirrotta, 2013). Pc can bind the H3K27me3 histone modification through its chromodomain, and this is thought to be important for anchoring the complex to chromatin. Together, Psc and Sce form a heterodimer, which enhances the E3 ubiquitin ligase activity of the complex. This activity is provided by the Sce subunit of PRC1, which monoubiquitylates H2AK118 (K119 in mammals) specifically. This ubiquitylation event is thought to restrict RNA polymerase II (Pol II) elongation, but was also shown to recruit PRC2 members (Blackledge et al., 2014). The Ph subunit contains a sterile alpha motif (SAM) domain, which facilitates self-association. This multimerization between Ph SAM domains in turn promotes clustering that is thought to enhance the binding of PcG proteins (Isono et al., 2013). PRC1-mediated events are also thought to compact chromatin to limit the access of activating factors and the Psc subunit in particular has been linked to this function.

By contrast, the PRC2 core complex is composed of Enhancer of zeste [E(z)], Suppressor of zeste 12 [Su(z)12], Extra sex combs (Esc) and p55 (Nurf55 or Caf1) (Di Croce and Helin, 2013; Schwartz and Pirrotta, 2013). E(z) contains a SET domain and is the PRC2 subunit responsible for the deposition of H3K27 methylation. Indeed, the SET domain, a very common protein domain housing histone methyltransferase (HMT) activity, was named in part after E(z), as the term SET comes from Su(var)3-9, Enhancer of zeste and TriThorax. Su(z)12 enhances E(z) activity and complex stability through a conserved VEFS-box domain [VRN2-EMF2-FIS2-Su(z)12 box] (O’Meara and Simon, 2012). The Esc subunit, on the other

hand, acts as a scaffold to facilitate protein-protein interactions via its WD repeats (named for the tryptophan and aspartic acid residues that complete the repeat motif) (O’Meara and Simon, 2012). Evidence from both *Drosophila* and mammalian systems suggests that Esc allosterically enhances PRC2 repression by imparting preferential binding to H3K27 trimethylation [the product of E(z) activity], thereby allowing local spreading of silencing (Margueron et al., 2009; O’Meara and Simon, 2012). The exact role of the p55 subunit appears to be more enigmatic. Unlike the other subunits, p55 is present in a number of other chromatin remodeling complexes (O’Meara and Simon, 2012). Furthermore, while p55 physically interacts with Su(z)12 as well as H3 and H4, the functional significance of these interactions is unclear because loss of p55 appears to have little consequence on PRC2 activity (Nowak et al., 2011; O’Meara and Simon, 2012; Wen et al., 2012).

The third grouping of Pho-containing Polycomb complexes consist of two subcomplexes (Klymenko, 2006). The first complex, referred to as Pho repressive complex (PhoRC), is composed of Pho and Sfmt. A second Pho-containing complex has also been described (Pho-INO80) that, in addition to Pho, contains the INO80 nucleosome remodeling complex (Klymenko, 2006). Notably, Pho is the only PcG protein identified to date with verified DNA-binding activity. Pho binds DNA in a sequence-specific manner and, in *Drosophila*, this is thought to help recruit PcG complexes to their response elements (Grossniklaus and Paro, 2014). Although Pho homologs (YY1) have been identified in mammals, it is unclear to what extent these Pho-containing complexes functionally relate to the *Drosophila* regulatory system (Kahn et al., 2014).

**TrxG complexes**

Because active transcription requires numerous steps, the repertoire of factors needed to maintain this state is complex. TrxG factors, therefore, include various DNA-binding, histone-modifying and chromatin remodeling proteins (Table 2) (Kingston and Tamkun, 2014; Schuettengruber et al., 2011; Steffen and Ringrose, 2014). Moreover, TrxG proteins participate in complexes necessary for both general transcription as well as those specifically required for maintaining the ‘on’ state of PcG target genes (Kingston and Tamkun, 2014).

TrxG-associated histone-modifying complexes include the COMPASS, COMPASS-like, TAC1 and ASH1 complexes (Table 2), and SET domain HMTs are pervasive components of these complexes. COMPASS and COMPASS-like contain both overlapping as well as distinct complex subunits (Table 2). Common subunits include Ash2, Dpy30 (Dpy-30L1), Hcf1 (Hcf),

**Table 1. PcG complex components**

| Subunit            | Complex | Mammalian homologs                    | Molecular function                                                                                   |
|--------------------|---------|---------------------------------------|------------------------------------------------------------------------------------------------------|
| Pc                 | PRC1    | CBX2, CBX4, CBX6, CBX7, CBX8          | Binds H2K27me3 via its chromodomain                                                                  |
| Psc                | PRC1    | BMI1 (PCGF4), MEL18 (PCGF2)           | Zinc finger domain-containing protein that binds DNA and compacts chromatin                          |
| Ph                 | PRC1    | PHC1 (EDR1), PHC2 (EDR2), PHC3 (EDR3) | Zinc finger SAM domain promotes self-association                                                     |
| Sce (dRing1)       | PRC1    | RING1A, RING1B                        | E3 ubiquitin ligase monoubiquitylates H2AK118 (K119 in mammals)                                      |
| E(z)               | PRC2    | EZH1, EZH2                            | Methylates H3K27 via its SET domain                                                                  |
| Su(z)12            | PRC2    | SUZ12                                 | Enhances E(z) activity via a VEFS-box domain                                                         |
| Esc                | PRC2    | EED                                   | Promotes protein-protein interactions via WD repeats and enhances repression via binding to H3K27me3 |
| p55 (Nurf55, Caf1) | PRC2    | RBAP46, RBAP48                        | Physically interacts with Su(z)12 and histones                                                       |
| Pho                | PhoRC   | YY1                                   | Sequence-specific DNA binding via a zinc finger motif                                                |
| Sfmt               | PhoRC   |                                       | Binds methylated lysines in H3 and H4                                                                |

PcG core components are illustrated with a focus on those with characterized functions. Common synonyms for complex components are provided in parentheses.

**Table 2. TrxG complex components**

| Subunit | Complex               | Mammalian homologs | Molecular function                                                 |
|---------|-----------------------|--------------------|--------------------------------------------------------------------|
| Set1    | COMPASS               | SET1A, SET1B       | Global methylation of H3K4 via its SET domain                      |
| Cfp1    | COMPASS               | CXXC1              | Binds CpG sequences                                                |
| Wdr82   | COMPASS               | WDR82              | Promotes recruitment                                               |
| Ash2    | COMPASS, COMPASS-like | ASH2L              | COMPASS and COMPASS-like complex component                         |
| Dpy30   | COMPASS, COMPASS-like | DPY30              | COMPASS and COMPASS-like complex component                         |
| Hcf     | COMPASS, COMPASS-like | HCF1               | COMPASS and COMPASS-like complex component                         |
| Wds     | COMPASS, COMPASS-like | WDR5               | Possible role in substrate positioning                             |
| Trx     | COMPASS-like, TAC1    | MLL1, MLL2         | Methylation of H3K4 via its SET domain at HOX genes                |
| Menin   | COMPASS-like          | Menin              | Promotes recruitment                                               |
| Trr     | COMPASS-like          | MLL3, MLL4         | Methylation of H3K4 via its SET domain at hormone-responsive genes |
| Utx     | COMPASS-like          | UTX (KDM6A)        | Demethylation of H3K27                                             |
| CBP     | TAC1, ASH1            |                    | Histone acetyltransferase with specificity for H3K27               |
| Ash1    | ASH1                  | ASH1L              | Methylation of H3K36 via its SET domain                            |

TrxG-associated proteins and the complexes they reside in are provided with a focus on the histone-modifying complexes.

Rbbp5 and Wds. Notably, the HMT subunits of the COMPASS and COMPASS-like complexes, all of which methylate H3K4, are among those that constitute distinct subunits with non-redundant functions in the cell. Namely, Set1 is responsible for global gene activation, whereas Trithorax (Trx) and Trithorax-related (Trr) appear to target specific genes (Schuettengruber et al., 2011; Shilatifard, 2012). The composition of TrxG complexes therefore dictates their function. For example, a COMPASS-like complex characterized by Trx and the COMPASS-like protein Menin (Mnn1) targets HOX genes, whereas a complex composed of Trr and Utx targets certain hormone-responsive genes (Schuettengruber et al., 2011). The TAC1 and ASH1 complexes appear to play more specific roles in counteracting PcG silencing, and both complexes are coupled to histone acetyltransferase (HAT) activity via CREB-binding protein (CBP; Nejiire – FlyBase) (Kingston and Tamkun, 2014; Kockmann et al., 2013; Schuettengruber et al., 2011). The enzymatic activities of TAC1 are provided by Trx and CBP to couple H3K4 methylation and H3K27 acetylation. Ash1, on the other hand, contains HMT activity specific for H3K36 (Schuettengruber et al., 2011). Although not touched upon in this review, a number of ATP-dependent chromatin remodeling complexes such as SWI/SNF, ISWI and various chromodomain helicase (CHD)-containing complexes recognize the histone tail modifications deposited by the aforementioned HMT and HAT complexes to facilitate active transcription (Kingston and Tamkun, 2014; Schuettengruber et al., 2011).

#### PcG/TrxG response elements: a simple toggle?

In *Drosophila*, the genomic nucleation sites of PcG- and TrxG-mediated epigenetic memory have been referred to as PcG/TrxG response elements (PRE/TREs) (Grossniklaus and Paro, 2014; Steffen and Ringrose, 2014). These regulatory DNA elements act as bistable, switchable elements that preserve the transcriptional state of their associated genes over cell generations. To date, a handful of *Drosophila* PRE/TREs have been extensively studied. Together, these studies have shown that PRE/TREs are self-contained genetic elements to which PcG and TrxG proteins bind and, when programmed to either an ‘on’ or ‘off’ state early in development, maintain that state later in development (Steffen and Ringrose, 2014). Despite all that has been learned, a number of fundamental questions still remain.

First, what is the full repertoire of PRE/TREs in the *Drosophila* and vertebrate genomes? Genomic studies have expanded the repertoire of PcG and TrxG targets far beyond HOX genes and their associated PRE/TREs to include thousands of genomic loci (Steffen

and Ringrose, 2014). Given that PRE/TREs have classically been defined by their ability to impart transcriptional memory, it will be important to know how many of these new PcG and TrxG binding sites truly function in this capacity. Likewise, while the PcG and TrxG proteins themselves as well as their targeting to specific genes are highly conserved, the mammalian counterpart of the PRE/TRE has been more difficult to pin down. Indeed, although some PRE/TRE-like elements have been identified, it is unclear if all of the properties of the *Drosophila* PRE/TRE (e.g. epigenetic memory) are maintained in the mammalian system (Grossniklaus and Paro, 2014; Kassis and Brown, 2013; Steffen and Ringrose, 2014).

A second key question that emerges concerns how PcG and TrxG proteins are recruited to these elements. We currently lack a clear understanding of the hierarchical recruitment of PcG and TrxG proteins to PRE/TREs, and elucidating these recruitment mechanisms is thus an area of active research. Given that Pho contains a DNA-binding domain and has been shown to be important for HOX gene silencing in *Drosophila*, it was suggested that Pho might initiate the nucleation of PcG proteins at targets (Wang et al., 2004). A recent report suggests, however, that efficient PhoRC recruitment to PREs is achieved not necessarily through Pho binding DNA, but rather via Sfmtb and PRC1 (Kahn et al., 2014). Moreover, because PRC1 was thought to bind chromatin through interactions with PRC2-deposited H3K27me3, a model in which PRC2 recruits PRC1 to chromatin has emerged (Cao et al., 2002; Wang et al., 2004). However, this idea has been challenged by observations that PRC1 can bind chromatin independently of PRC2 and H3K27me3 (Tavares et al., 2012). Conversely, more recent reports even suggest that PRC1 can recruit PRC2 (Blackledge et al., 2014; Cooper et al., 2014). Finally, with a number of publications implicating PcG and TrxG proteins in binding RNA, RNA-based mechanisms of PcG and TrxG recruitment have become attractive (Brockdorff, 2013; Mondal and Kanduri, 2013).

Finally, what determines the active (TRE) versus repressed (PRE) state? A simplistic model involving mutually exclusive binding of PcG or TrxG proteins to a PRE/TRE is unlikely because, as discussed in more detail below, PcG and TrxG proteins often colocalize at the same targets irrespective of the activation state of the regulated gene (Beisel et al., 2007; Enderle et al., 2011; Kockmann et al., 2013; Papp and Müller, 2006; Schwartz et al., 2010). Some evidence suggests that the repressed (PRE) state is the default and that the active (TRE) state is achieved by counteracting PcG-mediated silencing (Grossniklaus and Paro, 2014; Klymenko and Müller, 2004). By gaining a deeper understanding of the molecular interplay between PcG and TrxG proteins, we can begin to better appreciate the intricate relationship between these

complexes. Thus far, elucidating the complete picture has proved to be challenging. Nevertheless, interesting new insight has recently been gained, as illustrated below.

### Tippling the balance: the role of noncoding transcripts and lncRNAs

In recent years, chromatin-associated lncRNAs have captivated the attention of many. As with any hot topic, this interest stems in part from the mix of surprise and skepticism surrounding the breadth of the regulatory potential of these RNAs (Palazzo and Lee, 2015; Ponting and Belgard, 2010). As the number of functionally characterized lncRNAs increases, it is evident that this expanding field will offer valuable insights into chromatin biology (Cech and Steitz, 2014; Lee, 2012; Rinn and Chang, 2012; Sabin et al., 2013). Early reports identified links between specific lncRNAs and PcG-dependent silencing, and lncRNAs have thus often been associated with target gene repression (reviewed by Brockdorff, 2013; Mondal and Kanduri, 2013). However, and as we highlight below, a number of recent reports also implicate lncRNAs in activating gene expression (Cabanca et al., 2012; Gomez et al., 2013; Grote et al., 2013; Hamazaki et al., 2015; Herzog et al., 2014; Mulvey et al., 2014; Wang et al., 2011; Yang et al., 2014).

### lncRNA-dependent gene activation via disruption of PcG silencing

The PRE/TRE of the *Drosophila vestigial* (*vg*) gene provides a compelling example of a single regulatory element that bidirectionally produces lncRNAs implicated in both activation

and repression (Herzog et al., 2014). An element with this characteristic was termed a gene expression alternating RNA (GEAR) box (Fig. 1A). Strand-specific transcription through this regulatory region was shown to influence the balance between activation and repression, whereby developmentally regulated expression of one strand over the other dictates the state of gene expression. For example, at the *vg* locus the larvally transcribed forward strand was associated with silencing, and the embryonically transcribed reverse strand was associated with activation. The repression facilitated by the forward strand correlated with long-range pairing interactions between PREs. By contrast, the mechanism by which the reverse strand promoted activation appeared to involve inhibitory interactions between the lncRNA and PRC2. More specifically, it was shown that the lncRNA not only inhibits the HMT activity of the E(z) component of PRC2 but also locally displaces the complex from the *vg* locus (Fig. 1A). Interestingly, Herzog et al. (2014) also observed that both the forward and reverse lncRNAs bind to and inhibit the activity of PRC2 *in vitro* but only the reverse strand binds PRC2 *in vivo*. This curious finding implies that additional factors influence specific lncRNA-PRC2 binding interactions in the cellular context.

Recent observations in mammalian systems open up the possibility that this RNA binding might be a conserved aspect of PRC2 regulation. Indeed, a mammalian homolog of E(z), EZH2, can promiscuously bind RNA, and this RNA binding ability was shown to inhibit EZH2 activity (Cifuentes-Rojas et al., 2014; Kaneko et al., 2014, 2013). It has also been proposed that EED (the mammalian

#### A lncRNA-mediated disruption of PcG silencing

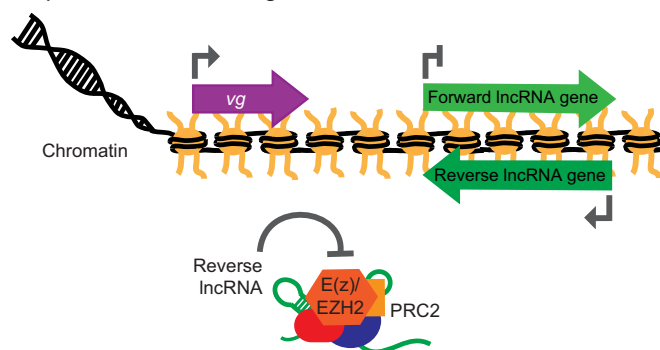

#### B lncRNA-TrxG physical association promotes activation

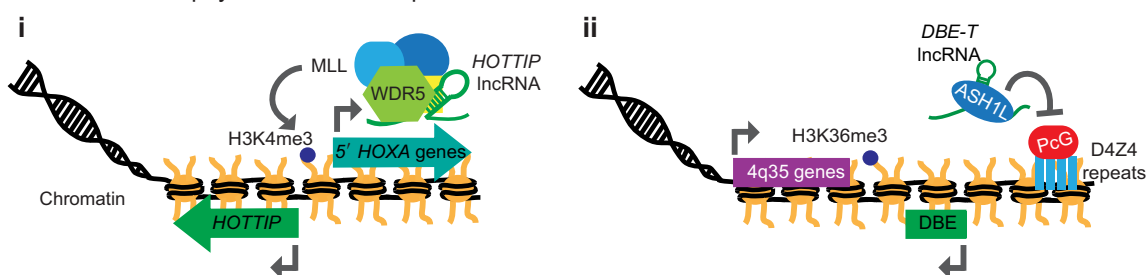

**Fig. 1. lncRNA-mediated mechanisms for promoting gene activation.** (A) In both *Drosophila* and mammalian systems, inhibitory interactions between lncRNAs and the PcG protein E(z)/EZH2 have been documented. At the *Drosophila* *vg* PRE/TRE, for example, strand-specific transcription through a regulatory region known as a gene expression alternating RNA (GEAR) box was shown to influence the balance between activation and repression. Specifically, the reverse strand is associated with activation by inhibiting E(z) HMT activity as well as chromatin localization. Evidence for multiple GEAR boxes in *Drosophila* and mouse suggest that this could be a common regulatory motif. (B) Physical interactions between lncRNAs and TrxG proteins can also promote gene activation. For example, the TrxG protein WDR5 has been shown to physically interact with the lncRNA *HOTTIP*, which is produced from the *HOXA* locus (shown in panel i). This interaction elicits gene activation via MLL-mediated H3K3 trimethylation. In the context of facioscapulohumeral muscular dystrophy (FSHD, panel ii), low copy numbers (<11) of D4Z4 repeats lead to the expression of a lncRNA (*DBE-T*) that physically associates with Ash1l to promote expression of 4q35 genes, which are normally silenced (Cabanca et al., 2012).

homolog of Esc) and JARID2 (a conserved PRC2-interacting factor) influence the RNA binding affinity of EZH2 (Cifuentes-Rojas et al., 2014), a finding that might provide clues as to the factors that contribute to RNA specificity at the *vg* locus in flies. Because JARID2 reduces EZH2 RNA affinity, the composition of the complex bound to the reverse strand could perhaps allow for stronger associations with the lncRNA in flies. Building upon what they learned at the *vg* GEAR box, Herzog et al. used bioinformatic analyses to provide support for several hundred candidate GEAR box elements in both the *Drosophila* and mouse genomes (Herzog et al., 2014). In fact, they found evidence for a GEAR box element at the homologous mouse *vg* locus, *Vgl2*, suggesting that GEAR box elements might be a conserved feature of many PRE/TREs. The proposed functional role of the additional GEAR boxes, however, remains to be experimentally validated.

Additionally, while the above-mentioned functional characterization of the *vg* GEAR box clearly implicates lncRNA regulation in activation, proper mRNA expression at the *vg* locus in flies also requires the TrxG system. That is to say, mutations in Trx result in abrogated activation (Pérez et al., 2011). It is possible that Trx is required for active transcription of the reverse strand lncRNA, although further studies are required to fully understand how Trx plays into this scenario.

#### lncRNA-dependent gene activation through physical association with TrxG components

While lncRNA interactions with PRC2 have been a prominent topic of investigation, it is becoming clearer that TrxG components can also physically associate with lncRNAs to regulate gene expression (Fig. 1B) (Cabianca et al., 2012; Gomez et al., 2013; Wang et al., 2011; Yang et al., 2014). One of the first and perhaps best-described examples of this comes from studies by the Chang lab looking at the vertebrate *HOXA* locus, which produces the long intergenic noncoding RNA (lincRNA) *HOTTIP* (Wang et al., 2011; Yang et al., 2014). They showed that *HOTTIP* is expressed from the 5' edge of the *HOXA* locus and inferred that *HOTTIP* might be conserved because a similar lincRNA could be found in human, mouse and chick. The pattern of tissue expression of *HOTTIP* was consistent with its genomic location, as *HOX* gene expression patterns correlate with their chromosomal position. In line with a role in promoting active transcription, *HOTTIP* was demonstrated to bind the TrxG protein WDR5 (Fig. 1B). The siRNA-mediated knockdown of *HOTTIP* revealed a distance-dependent relationship of the lincRNA with active transcription, with those genes nearest to the *HOTTIP* locus being most strongly affected. Furthermore, because *HOTTIP* knockdown resulted in reduced recruitment of the TrxG complex components Mll1 (KMT2A) and WDR5 as well as reduced H3K4 trimethylation at target genes, the lincRNA was deduced to be important for the recruitment of TrxG complexes (Fig. 1B).

In a follow-up study, Yang et al. characterized the RNA-binding surface of WDR5 (Yang et al., 2014). To assay the importance of RNA binding, the authors identified a mutation that abrogated RNA binding yet retained MLL catalytic activity. When this RNA-binding-deficient form of WDR5 was introduced into mouse embryonic stem cells (ESCs), defects in WDR5 chromatin localization and global H3K4 trimethylation were seen. Additionally, the authors noticed a nuclear-specific decrease in WDR5 protein stability, which suggested that RNA binding might stabilize the protein in the nucleus. To get a better picture of the full landscape of WDR5-RNA binding, WDR5-associated RNAs were sequenced. Roughly 1400 RNAs were found to be associated with wild-type WDR5. Although a number of important lncRNAs implicated in ESC pluripotency and

differentiation were identified, the RNA repertoire was not restricted to lncRNAs and also included mRNAs, primary microRNAs (pri-miRNAs) and small nucleolar RNAs (snoRNAs). Underscoring the functional importance of RNA binding activity, it was further shown that mouse ESCs expressing an RNA-binding-deficient WDR5 were compromised for maintaining their stem cell fate. Another example of a physiologically relevant WDR5-lncRNA interaction came from a study looking into the role of the lncRNA NeST (Gomez et al., 2013). In mouse CD8<sup>+</sup> T cells, this lncRNA was suggested to bind WDR5 and upregulate interferon- $\gamma$ . Moreover, NeST appeared to influence immunological phenotypes such as viral and bacterial infection susceptibility.

In addition to WDR5, another TrxG protein, Ash11, has been implicated in physical interactions with lncRNAs. Specifically, it was shown that a chromatin-associated lncRNA produced from primate-specific D4Z4 repeats termed *DBE-T* (for D4Z4 binding element-transcript) binds to Ash11 (Fig. 1B) (Cabianca et al., 2012). The D4Z4 repeats map to 4q35 and have been associated with facioscapulohumeral muscular dystrophy (FSHD), in which repeat copy number reduction results in the loss of silencing of 4q35 genes. The D4Z4 repeat functions similarly to a PRE in that it recruits PcG proteins. To examine *DBE-T*-associated gene activation, Cabianca et al. (2012) used primary samples from FSHD patients and healthy individuals as well as an engineered cell culture system. In this cell culture model, human chromosome 4 was introduced into Chinese Hamster Ovary (CHO) cells to generate monochromosomal hybrid cells (chr4/CHO). Using this approach, it was found that reduced repeat copy numbers in FSHD samples correlated with *DBE-T* expression and the derepression of silenced genes. Additionally, RNAi-mediated loss of PcG complexes or pharmacological loss of silencing resulted in *DBE-T* expression under conditions in which repeat number was within the healthy range. Consistent with derepression, Ash11 was enriched within the region under conditions in which the lncRNA was expressed. The authors went on to show that Ash11 binds to *DBE-T* in chr4/CHO cells and that, *in vitro*, the Ash11 SET domain directly binds *DBE-T*. Importantly, *DBE-T* knockdown resulted in impaired Ash11 recruitment and decreased H3K36 dimethylation. Altogether, these results imply that expression of *DBE-T* recruits Ash11 to facilitate H3K36 methylation and subsequent 4q35 gene transcription (Fig. 1B). Although derepression of 4q35 genes via *DBE-T* expression is associated with disease, at least one of the genes silenced by the D4Z4 repeats, *DUX4*, appears to have a normal role in development. It is therefore possible that the *DBE-T* lncRNA might play a role during normal development to promote 4q35 gene expression.

Other developmentally important lncRNAs have also been linked to TrxG proteins through physical interactions. For instance, in mice the *Fendrr* lncRNA, which is required for normal heart and body wall development, has been suggested to bind both PRC2 and MLL complexes (Grote et al., 2013). Likewise, in the context of *Drosophila* sex determination, the R2 antisense lncRNA has been implicated in promoting transcription of the *Sex lethal* gene via binding interactions with TrxG proteins (Mulvey et al., 2014). Furthermore, the generation of protein-RNA prediction algorithms such as catRAPID has enabled *in silico* analyses to support potential TrxG protein-lncRNA interaction pairs (Bellucci et al., 2011; Iglesias-Platas et al., 2012).

#### Histone modifications and histone-modifying factors that counteract repression

Post-translational modifications on histone tails can both positively and negatively influence the expression output of associated genes.

Importantly, early studies showed that TrxG-deposited histone modifications can inhibit PRC2 activity and can, hence, counteract gene repression (Klymenko and Müller, 2004; Papp and Müller, 2006). The molecular mechanisms behind this TrxG-dependent antagonism of PcG silencing are now starting to take shape (Schmitges et al., 2011; Yuan et al., 2011). The TrxG component Ash1 (mammalian homolog ASH1L) has emerged as a particularly vital player, and reports from the last half of the decade provide compelling evidence that the anti-repressive activity of Ash1 resides in its ability to catalyze H3K36 methylation (An et al., 2011; Dorigi and Tamkun, 2013; Miyazaki et al., 2013; Yuan et al., 2011). Additionally, recent evidence physically and functionally links Trx with CBP, suggesting that the histone-modifying activities of TrxG proteins might be coupled to counteract PcG silencing (Tie et al., 2014).

#### Active H3K36 and H3K4 methylation marks antagonize PRC2

Two reports in 2011 contributed greatly to our understanding of how TrxG-deposited histone marks associated with active gene expression might counteract PcG-mediated silencing (Schmitges et al., 2011; Yuan et al., 2011). These reports provided both *in vivo* as well as *in vitro* biochemical evidence for a mutually exclusive relationship between active and repressive marks on histone H3 tails. In essence, they demonstrated that the post-translational modifications left by TrxG proteins could preclude the activity of PcG complexes.

Specifically, Yuan et al. (2011) investigated the relationship between H3K27 and H3K36 methylation. They demonstrated that active H3K36me2 and me3 marks rarely co-immunoprecipitated with repressive H3K27me in purified mononucleosomes. Mass spectrometry revealed that only a very small percentage of histone H3 tails were di- or trimethylated at H3K27 while at the same time being di- or trimethylated at H3K36 in HeLa cells. Taking this further, the authors showed that PRC2 activity in HMT assays was inhibited if the substrates were pre-methylated at the H3K36 position. Together, these findings suggested that not only do activation-associated Ash1-deposited H3K36 methylation marks rarely coexist on the same histone tail with PRC2-deposited H3K27 methylation, but also that they are likely to inhibit PRC2 activity (Fig. 2A).

Further substantiation for active TrxG-deposited histone marks as impediments to PcG silencing came from structural and biochemical studies of the PRC2 component p55 (Nurf55) (Schmitges et al., 2011). In this study, which looked at both H3K36 methylation and H3K4 methylation, the authors saw that p55 binds the very N-terminus of H3. Importantly, K4 was among the residues found to be especially important for the molecular recognition of the H3 tail. Moreover, it was shown that if H3 was methylated (mono, di or tri) on K4, the binding of a p55-Su(z)12 complex was significantly reduced, as measured by fluorescence polarization and isothermal titration calorimetry (Fig. 2B). Similar to Yuan et al. (2011), Schmitges et al. (2011) found that H3K36me2 and me3 inhibited PRC2 activity. Furthermore, the activity of human, mouse and *Drosophila* PRC2 was inhibited by H3K4 and H3K36 methylation, suggesting that this is a conserved mechanism for inhibiting PcG-mediated silencing. Interestingly, when surveying the inhibition of PRC2 complexes in *Arabidopsis*, which possess three different Su(z)12 homologs in contrast to the single Su(z)12 found in mammals and flies, the authors found that Su(z)12 homologs had different levels of sensitivity to active marks; for example, EMBRYONIC FLOWER 2 (EMF2) was sensitive, whereas VERNALIZATION2 (VRN2) was insensitive to the

presence of H3K4me3 in HMT assays. This suggests that, in plants, PRC2 inhibition by active marks can be modulated by swapping out the Su(z)12 homolog.

How exactly TrxG-mediated H3K36 methylation inhibits PRC2 remains unclear. From a structural perspective, the inhibitory effect of K4 methylation makes sense because this residue is a clear point of contact. But K36 is located outside the p55-Su(z)12 binding site (Schmitges et al., 2011) so how does it inhibit PRC2? Although the exact inhibitory effect of H3K36 methylation on PRC2 biochemical activity remains to be determined, connections between this histone modification and Ash1, which has long been described as an 'anti-repressor', bolster its role in counteracting silencing (Dorigi and Tamkun, 2013; Klymenko and Müller, 2004; Kockmann et al., 2013; Miyazaki et al., 2013; Papp and Müller, 2006; Tanaka et al., 2007; Yuan et al., 2011).

#### TrxG proteins counteract PcG silencing by promoting H3K36 and H3K4 methylation

The aforementioned biochemical dissections illustrate a role for active methylation marks as physical impediments to PcG activity. It was suspected that the TrxG protein Ash1 might supply the enzymatic activity that deposits H3K36 dimethylation (Yuan et al., 2011) because the Ash1 SET domain closely resembles other bona fide H3K36 methyltransferases and, like other H3K36 methyltransferases, Ash1 preferred nucleosomal H3 over free H3 in HMT assays. Consistent with a role for Ash1 in methylating H3K36, alanine substitution at H3K36 on nucleosomal substrates resulted in loss of methylation by Ash1 *in vitro*. Likewise, methyl-lysine analogs of the di- and trimethylated state of H3K36 also blocked Ash1 activity. Over the years, however, conflicting reports on the specificity of Ash1 for different histone tail lysines have created controversy (An et al., 2011; Byrd and Shearn, 2003; Gregory et al., 2007; Tanaka et al., 2007; Yuan et al., 2011). The factors that account for the *in vitro* and *in vivo* differences in enzyme specificity for H3K4, H3K9, H3K36 and H4K20 residues are unclear. Regardless, mounting evidence generates a compelling argument that H3K36 methylation could play a prominent role in the mechanism by which Ash1 antagonizes PcG silencing (Fig. 2A).

A recent study in *Drosophila* that aimed to better characterize the TrxG protein Kismet (Kis) and how it counteracts PcG silencing has provided further insights into Ash1 function (Dorigi and Tamkun, 2013). Kis has been implicated in gene activation, both as a general transcription elongation factor and as a factor involved in counteracting PcG silencing, and Dorigi and Tamkun (2013) sought to determine if these two functions were connected. They found that pharmacological inhibition of transcription elongation had no negative effect on Kis functions that related to antagonizing PcG activity. Explicitly, Ash1 recruitment was unchanged and there was no increase in PcG-deposited H3K27 methylation upon blocking elongation. These findings are in line with another recent mouse ESC-based study, which similarly concluded that Ash1-dependent methylation of H3K36 and antagonism of PcG silencing occur independently of transcription elongation (Miyazaki et al., 2013). Having ruled out a link between the role of Kis in promoting transcription elongation and its involvement in Ash1 function, Dorigi and Tamkun (2013) went on to investigate how Kis might modulate Ash1 function. It had previously been shown, using loss-of-function mutants for Kis, that Kis was essential for the proper recruitment of Trx and Ash1 to chromatin (Srinivasan et al., 2008). Although this mutant background exhibited elevated levels of PRC2-deposited H3K27 methylation, PRC2 chromatin

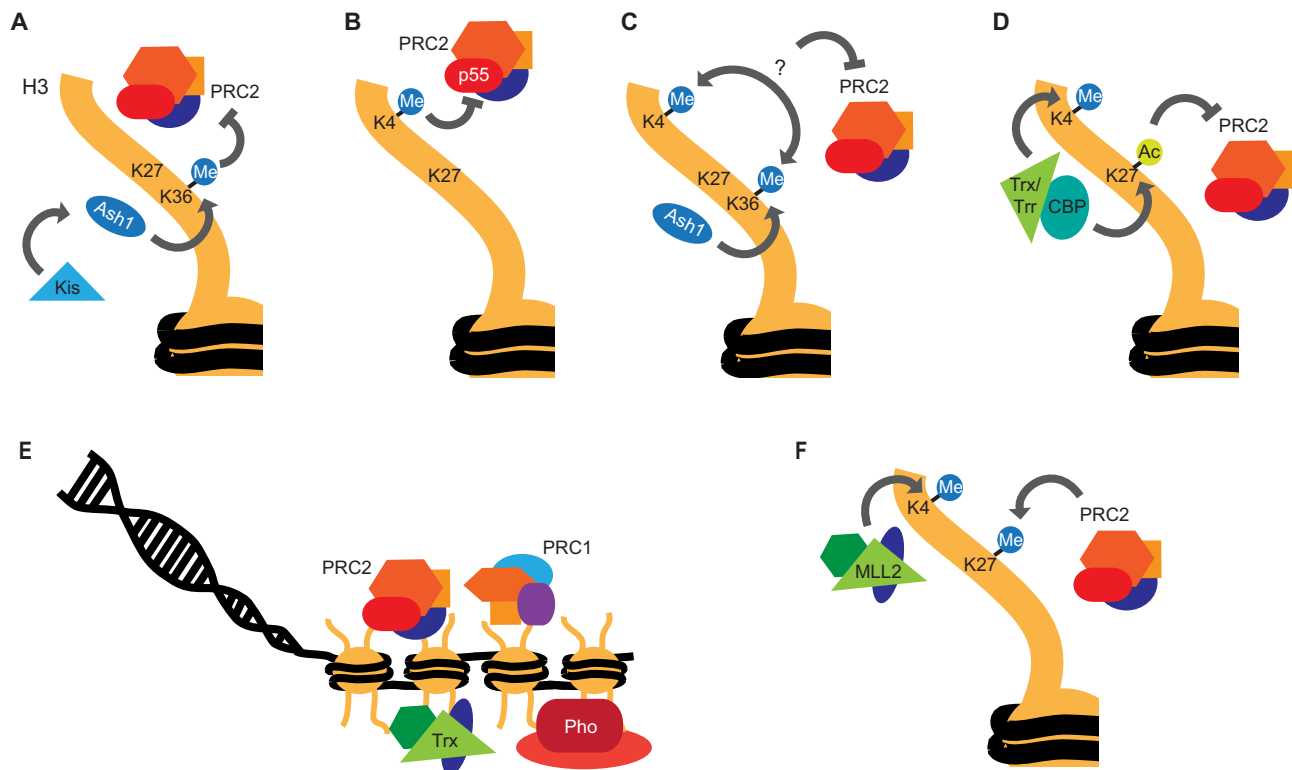

**Fig. 2. The interplay between TrxG and PcG proteins on chromatin.** Various examples of the interplay between TrxG and PcG proteins are depicted. These demonstrate that TrxG protein-deposited histone modifications can block PRC2 action (A-D) and that TrxG and PcG proteins can co-occupy and modify chromatin (E,F). (A) Ash1, with the help of Kis, trimethylates H3K36, which in turn inhibits the ability of PRC2 to methylate H3K27. (B) Methylation at H3K4 reduces the affinity of the PRC2 subunit p55 (Nurf55) for H3. (C) Impairment of Ash1, an H3K36-specific HMT, results in reductions in H3K4 methylation, suggesting that these modifications might reinforce each other. (D) Trx and Trr physically associate with CBP to potentially couple H3K27 acetylation to counteract PRC2-deposited H3K27 methylation. (E) Multiple PcG proteins and complexes (PRC1, PRC2 and Pho) can colocalize with TrxG proteins on chromatin. (F) MLL2 serves as the TrxG HMT at bivalent domains, which have the curious feature of harboring simultaneous activation-associated H3K4me3 and silencing-associated H3K27me3 marks.

association remained unchanged and prompted the idea that Kis might antagonize PRC2 activity rather than recruitment. Interestingly, *kis* mutant larvae display reduced levels of H3K36 methylation, suggesting that Kis might antagonize PcG activity by promoting H3K36 methylation (Dorigi and Tamkun, 2013). Given that Ash1 is important for Ash1 chromatin association, and the fact that Ash1 can catalyze H3K36 methylation, this paints a picture in which Kis promotes Ash1 recruitment and subsequent H3K36 methylation (Fig. 2A) (Dorigi and Tamkun, 2013; Miyazaki et al., 2013; Srinivasan et al., 2008; Tanaka et al., 2007; Yuan et al., 2011). Consistent with this, Dorigi and Tamkun (2013) saw that mutations in Ash1 resulted in a loss of H3K36 dimethylation and increased H3K27me3 on polytene chromosomes. Thus, Ash1-deposited H3K36 methylation most likely inhibits PRC2-catalyzed H3K27 methylation. An interesting line of future inquiry will be to figure out how exactly Kis promotes Ash1 recruitment. Because *in vitro* and *in vivo* physical interactions between Ash1 and Kis have been elusive to capture, the influence that Kis exerts over Ash1 recruitment is unlikely to involve direct physical associations (Dorigi and Tamkun, 2013; Srinivasan et al., 2008).

These findings, which imply that Ash1 plays a key role in counteracting PcG silencing, are in line with a previous report suggesting that Ash1 blocks repressive PcG-deposited H3K27, H3K9 and H4K20 trimethylation in the 'on' state in flies (Papp and Müller, 2006). Back in 2006, Papp and Müller saw that, in developing *Drosophila* tissues, both PcG and TrxG complexes were present at the *Ultrabithorax (Ubx)* PRE regardless of the expression

state of the *Ubx* gene (Papp and Müller, 2006). Ash1, however, was selectively bound downstream of the transcriptional start site only in the 'on' state and correlated with a lack of repressive modifications in the promoter and gene body. Consistent with the findings from Dorigi and Tamkun (2013), mutations in *ash1* resulted in aberrant repressive H3K27 methylation in this earlier study. At the time, the authors surveyed H3K4 methylation rather than H3K36 methylation and, intriguingly, they saw that H3K4 methylation was decreased in the *ash1* mutant background. Although this could suggest that Ash1 also methylates H3K4 *in vivo*, this observation might also imply a relationship between H3K4 and H3K36, such that a level of cross-talk exists whereby H3K36 and H3K4 reinforce each other and loss of Ash1-dependent H3K36 methylation also somehow leads to loss of H3K4 methylation (Fig. 2C). However, it was observed that Ash1 must have a much more general role in functioning as a global co-activator of transcription (Kockmann et al., 2013); acting together with another TrxG protein, Female sterile (1) homeotic [Fs(1)h], Ash1 was found at many active gene promoters. Hence, in this case the PcG-mediated silencing would need to overcome the general transcription-promoting function of Ash1 and Fs(1)h in order to silence genes.

H3K4 methylation was the focus of a recent paper linking CBP and the HMTs Trx and Trr in *Drosophila* (Tie et al., 2014). In this study, it was found that Trx and Trr were monomethyltransferases, and the authors identified specific tyrosine residues that limited additional methylation *in vitro*. Further supporting roles for Trx and Trr as a monomethyltransferase *in vivo* could be seen with inactivating

mutations, *trx<sup>Z11</sup>* and *trr<sup>3</sup>*, where only H3K4me1 and not H3K4me3 levels were reduced. The authors went on to show that Trx and Trr physically associate with CBP. Consistent with previously described functions for CBP in counteracting PcG silencing via H3K27 acetylation, they saw that the perturbations in PcG silencing upon overexpression of *trx* were dependent on CBP (Fig. 2D). Furthermore, the genome-wide chromatin localization patterns of Trx, Trr, CBP and H3K4me1 largely overlapped. Biochemical evidence provided by *in vitro* acetylation assays suggested that monomethylation of H3K4 positively influenced CBP-mediated H3K27 acetylation. Pulling it altogether, Trx-catalyzed H3K4 methylation inhibits PRC2 binding (Schmitges et al., 2011) while at the same time through physical and functional associations with CBP promotes H3K27 acetylation to block repressive H3K27 methylation (Tie et al., 2014).

### TrxG and PcG co-occupation: the front lines of the battle

In the above examples, TrxG-associated activities act to inhibit PRC2 binding, activity, or both at target loci. However, it is unlikely that the above-mentioned mechanisms converge into a single overarching paradigm such that TrxG-associated activities at every locus ultimately limit the recruitment of PcG proteins. Indeed, PRC2-deposited H3K27me3 is canonically thought to recruit PRC1 and, with clear instances of Trx-mediated PRC2 inhibition, one would expect very little co-occupancy of TrxG proteins and PRC1 components. Contrary to this expectation, a number of reports show that Trx, PRC2 and PRC1 can occupy overlapping sets of genomic loci (Beisel et al., 2007; Enderle et al., 2011; Kockmann et al., 2013; Papp and Müller, 2006; Schwartz et al., 2010). Thus, the mechanisms employed by TrxG proteins to counteract PcG-mediated silencing are likely to be complex. Bivalent domains, which are unique and somewhat puzzling features in which both active H3K4me3 and silent H3K27me3 modifications mark a subset of promoters (Voigt et al., 2013), also represent curious conditions indicative of the simultaneous action of both PcG and TrxG proteins in mammalian cells. Although these domains remain controversial, evidence suggests that they do genuinely occur at certain frequencies. With H3K4 and H3K27 methylation being catalyzed by TrxG and PcG proteins, respectively, bivalent domains have the potential to tell us a lot about the interplay between these two counteracting systems.

### PcG and TrxG proteins colocalize on chromatin

As mentioned above, we have known for nearly a decade that both activation- (TrxG) and silencing- (PhoRC, PRC1, and PRC2) associated complexes appear to be assembled in both the 'on' and 'off' states at the *Drosophila Ubx* PRE (Fig. 2E) (Papp and Müller, 2006). However, genomic approaches in a number of *Drosophila* cell lines suggest that this phenotype is widespread (Beisel et al., 2007; Enderle et al., 2011; Schwartz et al., 2010).

For example, in the embryonically derived Kc and SF4 *Drosophila* cell lines, exhaustive chromatin immunoprecipitation (ChIP) followed by DNA tiling array (ChIP-chip) analyses of the *ANT-C* and *BX-C* loci, which contain several HOX gene clusters, demonstrated extensive overlap of PcG and TrxG proteins (Beisel et al., 2007). Here, the analysis focused on Trx and Pho as well as the PRC1 components Pc, Ph and Psc. Notably, at virtually all PRC1 and Pho binding sites, Trx could also be detected irrespective of gene expression state. Active and repressed genes, however, displayed marked differences in Pho distribution such that repressed genes had discrete promoter-associated Pho peaks whereas the Pho signal was spread across the gene bodies of active genes. Prominent Pho signal could likewise be detected at the heat shock puffs on

polytene chromosomes. Polytene chromosomes are, for example, found in *Drosophila* salivary glands and are formed by repeated rounds of DNA replication in the absence of cell division. This natural amplification allows for low-resolution imaging of the entire genome, and highly transcribed regions (such as heat shock loci under induction) form recognizable puffed structures. Importantly, *pho<sup>1</sup>* mutant larvae took longer to re-silence upon recovery from heat shock stress, suggesting a role for Pho in re-silencing. Given that Pho is important for silencing, this association with actively transcribed gene bodies was intriguing. Furthermore, the difference in the distribution of Pho when comparing active and repressed states could be telling us something about switches in gene expression states.

Recently, Pho was demonstrated to genetically and physically interact with *Drosophila* Spt5 (Harvey et al., 2013), which is a factor that is essential for promoter-proximal pausing and that, upon phosphorylation by P-TEFb (Cdk9/Cyclin T1), is converted into an elongation-promoting factor. Additionally, Pho and Spt5 binding sites substantially overlapped genome-wide in *Drosophila* S2 cells. Such an interaction provides a potential means for Pho to spread beyond its recognition sequence to associate with broad regions of active transcription. Pho is not the only PcG protein that has been associated with paused genes. Indeed, PRC1 preferentially targets paused promoters (Enderle et al., 2011). Likewise, PcG repression has been suggested to convey tissue-specific control over poised Pol II in the context of *Drosophila* development (Gaertner et al., 2012).

The extensive colocalization of TrxG and PcG proteins seen by the above ChIP-chip analysis at the *ANT-C* and *BX-C* loci was expanded by larger ChIP-chip and ChIP-seq analyses in BG3, D23, Sg4 and S2 *Drosophila* tissue culture cells (Enderle et al., 2011; Schwartz et al., 2010). Consistently, all of these studies report pervasive overlaps in the targeting of TrxG and PcG complexes.

### Bivalent promoters: inherently balanced between TrxG and PcG activities

Although the above examples furnish evidence that PcG and TrxG proteins can co-occupy overlapping sets of genomic locations, it should be noted that the experimental approaches have been based on ChIP analyses of ensembles of cells that, due to technical limitations, cannot definitively determine that both complexes are simultaneously present in the same cell, at the same genomic locus. Such arguments have also been applied to question the existence of bivalent domains at which the histone marks deposited by both TrxG and PcG complexes are found. In the case of bivalent promoter domains, efforts to analyze more homogenous populations, as well as sequential ChIP approaches, argue that both PcG-deposited H3K27me3 and TrxG-deposited H3K4me3 can coexist (Fig. 2F) (Voigt et al., 2013). Initially discovered in ESCs, these domains have since been detected in non-stem cell populations. In addition, new evidence has identified Mll2 (Kmt2b/d) as the TrxG-associated H3K4me3 methyltransferase dedicated to bivalent promoters (Fig. 2B) (Hu et al., 2013). Curiously, however, Mll2 knockdown had no influence on ESC self-renewal nor did it affect the rapid induction of bivalent genes in response to retinoic acid stimulus (Denissov et al., 2014; Hu et al., 2013). Given that bivalency has been proposed to poise developmental genes for rapid activation (Voigt et al., 2013), this observation was unexpected and calls into question the function of bivalency. Independent evidence for Mll2 being the bivalent domain H3K4 methyltransferase came in 2014 (Denissov et al., 2014), but, in this study, the authors further examined the interplay between the various Set1/Trithorax-type H3K4 methyltransferases.



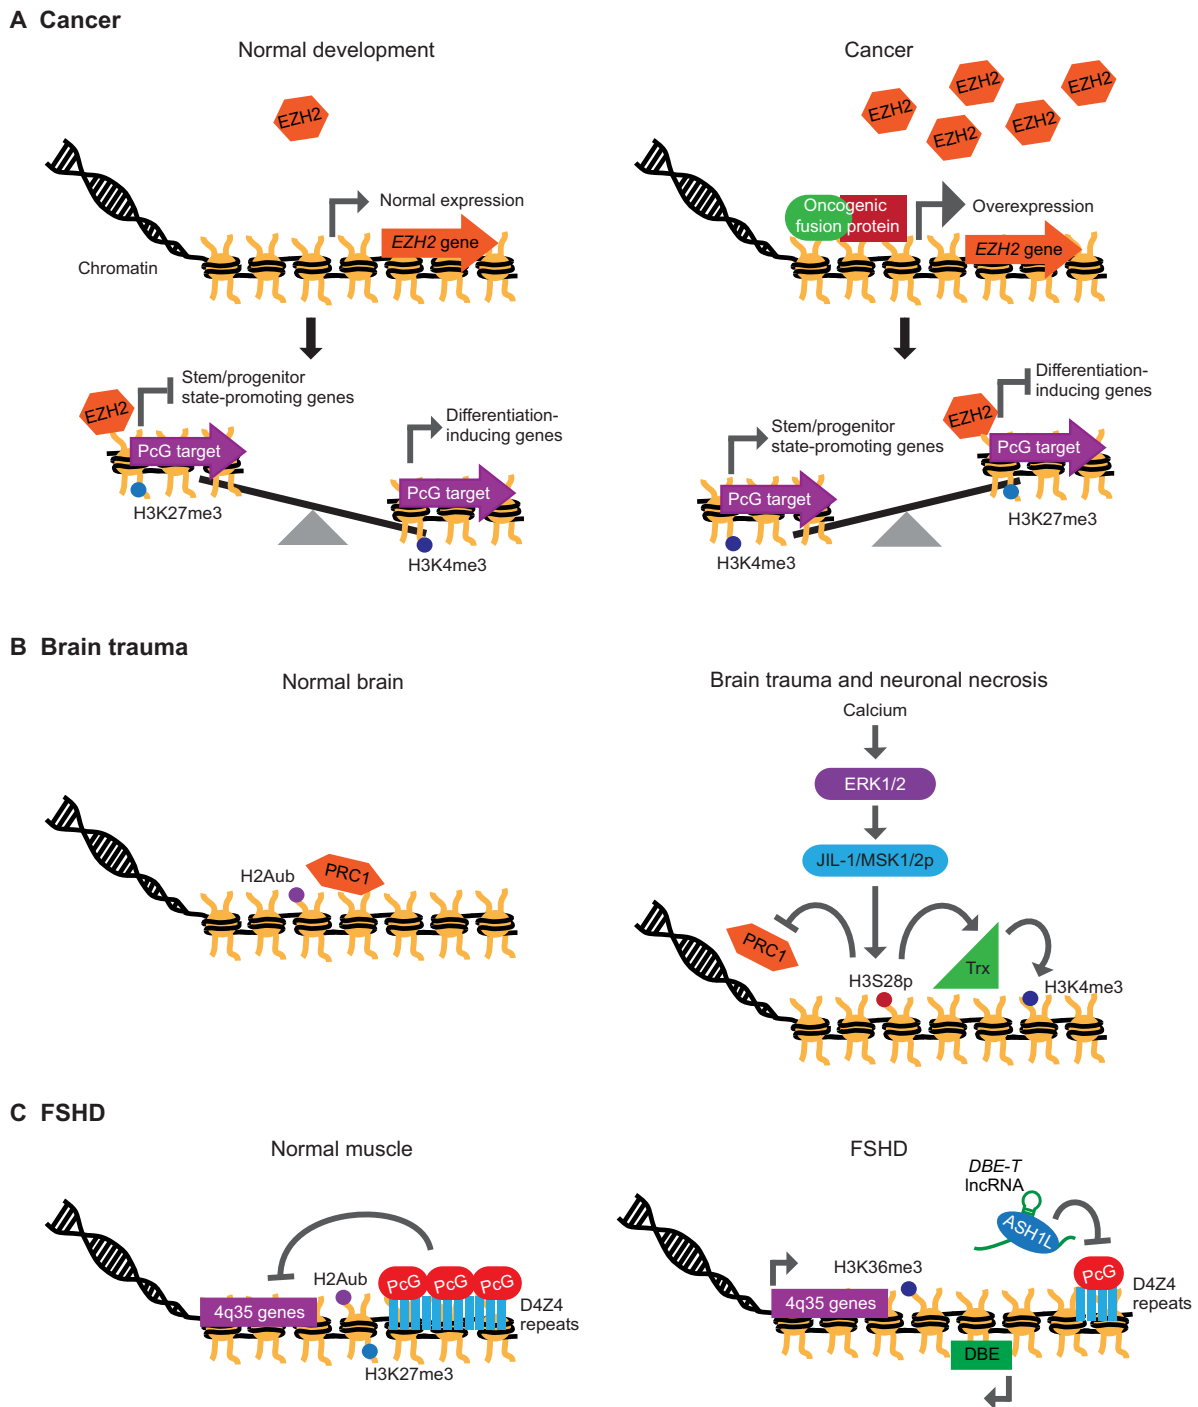

**Fig. 3. TrxG and PcG activities out of balance in disease.** (A) A hallmark of leukemia is a block in differentiation, and abnormalities in the balance between PcG silencing and TrxG activation could underlie these differentiation defects. Indeed, oncogenic MLL fusion proteins have been shown to upregulate *EZH2*, and upon increased *EZH2* expression the balance of PcG target gene expression seems to shift towards the repression of differentiation-promoting genes. (B) Neurodegenerative phenotypes in stroke, Alzheimer's disease, epilepsy and traumatic brain injuries have been linked to neuronal necrosis, and during this event influxes of calcium are thought to activate extracellular signal-regulated kinase (ERK1/2). Downstream of ERK1/2 signaling, JIL-1/MSK1/2 is stimulated, which in turn phosphorylates H3S28. This phosphorylation event displaces PRC1 from chromatin and activates Trx, resulting in increased H3K4me3. (C) D4Z4 repeats function like a PRE to recruit PcG complexes to illicit H2AK119ub and H3K27me3. This in turn results in the repression of 4q35 genes including *ANT1* (*SLC25A4*), *FRG1*, *FRG2* and *DUX4*. However, repeat copy numbers can vary among individuals and in FSHD low copy numbers are pathogenic. When repeat copy number is low, the lncRNA *DBE-T* is expressed and binds Ash1l to facilitate activation of 4q35 genes and counteract PcG silencing.

Like Hu et al. (2013), they determined that Mll2 is required for H3K4me3 at bivalent promoters. Mll2 could be found at both bivalent as well as active promoters, but active gene expression did not require Mll2. Whereas Mll2 was bound at both bivalent and

active promoters, Cxxc1, a Set1 complex subunit, was found only at active gene promoters. Consistent with the findings from Hu et al. (2013), Denissov et al. (2014) further showed that the induction of genes with bivalent promoters was not influenced by abrogation of

the bivalent state upon loss of Mll2. The authors instead propose that Mll2 might function as a 'pioneer trimethyltransferase' that marks promoters with H3K4me3 and that PcG proteins might keep bivalent genes from being activated by other HMTs such as the Set1 complex (Denissov et al., 2014).

### TrxG and PcG activities out of balance in disease

Underscoring the importance of their balanced activities, misregulation that disrupts the balance between PcG and TrxG proteins has been linked to disease states such as cancer, neuronal damage and muscular dystrophy (Fig. 3). For example, a hallmark of leukemia is a block in differentiation, and abnormalities in the balance between PcG silencing and TrxG activation – specifically between EZH2 and MLL (Thiel et al., 2013) – could underlie these differentiation defects (Fig. 3A). The literature linking PcG and TrxG proteins to cancer, however, is vast and complicated with perhaps more questions raised than answered (see reviews by Grossniklaus and Paro, 2014; Kingston and Tamkun, 2014; Koppens and van Lohuizen, 2015; Sauvageau and Sauvageau, 2010; Scelfo et al., 2015). Indeed, lending support to many PcG proteins serving as oncogenes, overexpression of the genes encoding PcG proteins is widespread in a multitude of cancer types (Grossniklaus and Paro, 2014; Koppens and van Lohuizen, 2015). Nonetheless, the exact same factors in many instances have been implicated as tumor suppressors in a different context. EZH2 provides a compelling example of this, in which activating mutations result in lymphomas and overexpression is seen in a number of solid tumors yet inactivating mutations promote myeloid malignancies (Hock, 2012; Koppens and van Lohuizen, 2015). Perhaps context-dependent considerations, such as the exact cohort of misregulated targets within the cell and the balance between PcG and TrxG regulation, influence whether these chromatin regulators function as tumor suppressors versus oncogenes (Koppens and van Lohuizen, 2015).

Aberrations in the balance between TrxG and PcG activities are likely to extend beyond the context of cancer. For instance, the damage induced during neuronal necrosis might result from such disruptions (Fig. 3B). In the context of stroke and brain trauma, calcium overload induces neuronal necrosis and, in *Drosophila* and rodent models, it was recently seen that this necrosis is regulated by a series of chromatin-dependent events (Liu et al., 2014). Explicitly, a cascade of events is initiated by phosphorylation of histone H3 serine 28 (H3S28ph) by JIL-1 (the *Drosophila* homolog of MSK1/2). H3S28ph leads to eviction of PRC1 and Trx activation (Fig. 3B). Importantly, inhibition of these events alleviated necrosis *in vitro* and *in vivo* (Liu et al., 2014).

Also, as illustrated above in our discussion of *DBE-T*-facilitated Ash11 recruitment, aberrant derepression of PcG-silenced genes in the context of FSHD is likely to occur via a disruption in the balance between PcG and TrxG activities (Cabianca et al., 2012). Here, low repeat copy numbers result in the expression of a lncRNA, which in turn recruits Ash11 to illicit activation of 4q35 genes (Fig. 3C). Perhaps other repeat-associated diseases might likewise tip the balance between PcG and TrxG activities towards pathogenic states.

### Perspectives

Fine-tuning the balance between active and repressed chromatin is one of the most crucial tasks of a cell. However, how can constitutively expressed chromatin factors that are required to maintain differential expression patterns, and that apparently coexist at most regulatory sites, generate such opposing activities? Most of

our knowledge on how PcG and TrxG proteins control target gene expression is based on ChIP analyses of bulk material. Hence, short-term dynamic changes will be lost and cell-to-cell variations averaged out. Historically, the regulation of HOX genes was considered the role model with which to study mechanisms of transcriptional memory. But, more recent studies have highlighted that the clientele of PcG and TrxG proteins is much broader and includes target genes with highly fluctuating expression profiles, suggesting that the control these complexes impose over gene expression can be far from static. Even at the single gene level, the dynamics of gene expression, whether continuous or in bursts, need to be considered (Hebenstreit, 2013) if the two opposing activities are to be better understood. Hence, future work will need to assess the balance between PcG silencing and TrxG activation in a much more time-resolved manner at regulatory sites. This entails the development of more sensitive ChIP methods (Lara-Astiaso et al., 2014), the establishment of *in vivo* observation methods and eventually the *in vitro* reconstitution of chromatin-controlled transcriptional processes and even of the process of epigenetic memory. Given the fundamental roles that PcG and TrxG proteins play in epigenetic gene control, together with the dire consequences observed in many diseases if a fine balance between these proteins is not maintained, these additional research challenges will certainly be highly rewarding.

### Acknowledgements

We thank Federico Comoglio and Allwyn Pereira for suggestions on the manuscript.

### Competing interests

The authors declare no competing or financial interests.

### Funding

S.J.G. is supported by an ETH Fellowship and the work of R.P. is supported by grants from the Swiss National Science Foundation, Epigenesys and the ETH Zurich.

### References

- An, S., Yeo, K. J., Jeon, Y. H. and Song, J.-J. (2011). Crystal structure of the human histone methyltransferase ASH1L catalytic domain and its implications for the regulatory mechanism. *J. Biol. Chem.* **286**, 8369-8374.
- Beisel, C., Buness, A., Roustan-Espinosa, I. M., Koch, B., Schmitt, S., Haas, S. A., Hild, M., Katsuyama, T. and Paro, R. (2007). Comparing active and repressed expression states of genes controlled by the Polycomb/Trithorax group proteins. *Proc. Natl. Acad. Sci. USA* **104**, 16615-16620.
- Bellucci, M., Agostini, F., Masin, M. and Tartaglia, G. G. (2011). Predicting protein associations with long noncoding RNAs. *Nat. Methods* **8**, 444-445.
- Blackledge, N. P., Farcas, A. M., Kondo, T., King, H. W., McGouran, J. F., Hanssen, L. L. P., Ito, S., Cooper, S., Kondo, K., Koseki, Y. et al. (2014). Variant PRC1 complex-dependent H2A ubiquitylation drives PRC2 recruitment and polycomb domain formation. *Cell* **157**, 1445-1459.
- Brockdorff, N. (2013). Noncoding RNA and Polycomb recruitment. *RNA* **19**, 429-442.
- Byrd, K. N. and Shearn, A. (2003). ASH1, a *Drosophila* trithorax group protein, is required for methylation of lysine 4 residues on histone H3. *Proc. Natl. Acad. Sci. USA* **100**, 11535-11540.
- Cabianca, D. S., Casa, V., Bodega, B., Xynos, A., Ginelli, E., Tanaka, Y. and Gabellini, D. (2012). A long ncRNA links copy number variation to a polycomb/trithorax epigenetic switch in FSHD muscular dystrophy. *Cell* **149**, 819-831.
- Cao, R., Wang, L., Wang, H., Xia, L., Erdjument-Bromage, H., Tempst, P., Jones, R. S. and Zhang, Y. (2002). Role of histone H3 lysine 27 methylation in Polycomb-group silencing. *Science* **298**, 1039-1043.
- Cech, T. R. and Steitz, J. A. (2014). The noncoding RNA revolution-trashing old rules to forge new ones. *Cell* **157**, 77-94.
- Cifuentes-Rojas, C., Hernandez, A. J., Sarma, K. and Lee, J. T. (2014). Regulatory interactions between RNA and polycomb repressive complex 2. *Mol. Cell* **55**, 171-185.
- Cooper, S., Dienstbier, M., Hassan, R., Schermelleh, L., Sharif, J., Blackledge, N. P., De Marco, V., Elderkin, S., Koseki, H., Klose, R. et al. (2014). Targeting polycomb to pericentric heterochromatin in embryonic stem cells reveals a role for H2AK119u1 in PRC2 recruitment. *Cell Rep.* **7**, 1456-1470.

- Denissov, S., Hofmeister, H., Marks, H., Kranz, A., Ciotta, G., Singh, S., Anastasiadis, K., Stunnenberg, H. G. and Stewart, A. F. (2014). MII2 is required for H3K4 trimethylation on bivalent promoters in embryonic stem cells, whereas MII1 is redundant. *Development* **141**, 526-537.
- Di Croce, L. and Helin, K. (2013). Transcriptional regulation by Polycomb group proteins. *Nat. Struct. Mol. Biol.* **20**, 1147-1155.
- Dorigi, K. M. and Tamkun, J. W. (2013). The trithorax group proteins Kismet and ASH1 promote H3K36 dimethylation to counteract Polycomb group repression in *Drosophila*. *Development* **140**, 4182-4192.
- Enderle, D., Beisel, C., Stadler, M. B., Gerstung, M., Athri, P. and Paro, R. (2011). Polycomb preferentially targets stalled promoters of coding and noncoding transcripts. *Genome Res.* **21**, 216-226.
- Gaertner, B., Johnston, J., Chen, K., Wallaschek, N., Paulson, A., Garruss, A. S., Gaudenz, K., De Kumar, B., Krumlauf, R. and Zeitlinger, J. (2012). Poised RNA polymerase II changes over developmental time and prepares genes for future expression. *Cell Rep.* **2**, 1670-1683.
- Gomez, J. A., Wapinski, O. L., Yang, Y. W., Bureau, J.-F., Gopinath, S., Monack, D. M., Chang, H. Y., Brahic, M. and Kirkegaard, K. (2013). The NeST long ncRNA controls microbial susceptibility and epigenetic activation of the interferon- $\gamma$  locus. *Cell* **152**, 743-754.
- Gregory, G. D., Vakoc, C. R., Rozovskaia, T., Zheng, X., Patel, S., Nakamura, T., Cnaan, E. and Blobel, G. A. (2007). Mammalian ASH1L is a histone methyltransferase that occupies the transcribed region of active genes. *Mol. Cell Biol.* **27**, 8466-8479.
- Grossniklaus, U. and Paro, R. (2014). Transcriptional silencing by polycomb-group proteins. *Cold Spring Harb. Perspect. Biol.* **6**, a019331.
- Grote, P., Wittler, L., Hendrix, D., Koch, F., Währisch, S., Beisaw, A., Macura, K., Bläss, G., Kellis, M., Werber, M. et al. (2013). The tissue-specific lncRNA Fendrr is an essential regulator of heart and body wall development in the mouse. *Dev. Cell* **24**, 206-214.
- Hamazaki, N., Uesaka, M., Nakashima, K., Agata, K. and Imamura, T. (2015). Gene activation-associated long noncoding RNAs function in mouse preimplantation development. *Development* **142**, 910-920.
- Harvey, R., Schuster, E. and Jennings, B. H. (2013). Pleiohomeotic interacts with the core transcription elongation factor Spt5 to regulate gene expression in *Drosophila*. *PLoS ONE* **8**, e70184.
- Hebenstreit, D. (2013). Are gene loops the cause of transcriptional noise? *Trends Genet.* **29**, 333-338.
- Herzog, V. A., Lempradl, A., Trupke, J., Okulski, H., Altmutter, C., Ruge, F., Boidol, B., Kubicek, S., Schmauss, G., Aumayr, K. et al. (2014). A strand-specific switch in noncoding transcription switches the function of a Polycomb/Trithorax response element. *Nat. Genet.* **46**, 973-981.
- Hock, H. (2012). A complex Polycomb issue: the two faces of EZH2 in cancer. *Genes Dev.* **26**, 751-755.
- Hu, D., Garruss, A. S., Gao, X., Morgan, M. A., Cook, M., Smith, E. R. and Shilatifard, A. (2013). The MII2 branch of the COMPASS family regulates bivalent promoters in mouse embryonic stem cells. *Nat. Struct. Mol. Biol.* **20**, 1093-1097.
- Iglesias-Platas, I., Martin-Trujillo, A., Cirillo, D., Court, F., Guillaumet-Adkins, A., Camprubi, C., Bourc'his, D., Hata, K., Feil, R., Tartaglia, G. et al. (2012). Characterization of novel paternal ncRNAs at the *Plagl1* locus, including Hymai, predicted to interact with regulators of active chromatin. *PLoS ONE* **7**, e38907.
- Isono, K., Endo, T. A., Ku, M., Yamada, D., Suzuki, R., Sharif, J., Ishikura, T., Toyoda, T., Bernstein, B. E. and Koseki, H. (2013). SAM domain polymerization links subnuclear clustering of PRC1 to gene silencing. *Dev. Cell* **26**, 565-577.
- Kahn, T. G., Stenberg, P., Pirrotta, V. and Schwartz, Y. B. (2014). Combinatorial interactions are required for the efficient recruitment of the repressive complex (PhoRC) to polycomb response elements. *PLoS Genet.* **10**, e1004495.
- Kaneko, S., Son, J., Shen, S. S., Reinberg, D. and Bonasio, R. (2013). PRC2 binds active promoters and contacts nascent RNAs in embryonic stem cells. *Nat. Struct. Mol. Biol.* **20**, 1258-1264.
- Kaneko, S., Son, J., Bonasio, R., Shen, S. S. and Reinberg, D. (2014). Nascent RNA interaction keeps PRC2 activity poised and in check. *Genes Dev.* **28**, 1983-1988.
- Kassis, J. A. and Brown, J. L. (2013). Polycomb group response elements in *Drosophila* and vertebrates. *Adv. Genet.* **81**, 83-118.
- Kingston, R. E. and Tamkun, J. W. (2014). Transcriptional regulation by trithorax-group proteins. *Cold Spring Harb. Perspect. Biol.* **6**, a019349.
- Klymenko, T. (2006). A Polycomb group protein complex with sequence-specific DNA-binding and selective methyl-lysine-binding activities. *Genes Dev.* **20**, 1110-1122.
- Klymenko, T. and Müller, J. (2004). The histone methyltransferases Trithorax and Ash1 prevent transcriptional silencing by Polycomb group proteins. *EMBO Rep.* **5**, 373-377.
- Kockmann, T., Gerstung, M., Schlumpf, T., Xhinzhou, Z., Hess, D., Beerenwinkel, N., Beisel, C. and Paro, R. (2013). The BET protein FSH functionally interacts with ASH1 to orchestrate global gene activity in *Drosophila*. *Genome Biol.* **14**, R18.
- Koppens, M. and van Lohuizen, M. (2015). Context-dependent actions of Polycomb repressors in cancer. *Oncogene* (in press).
- Lara-Astiaso, D., Weiner, A., Lorenzo-Vivas, E., Zaretzky, I., Jaitin, D. A., David, E., Keren-Shaul, H., Mildner, A., Winter, D., Jung, S. et al. (2014). Chromatin state dynamics during blood formation. *Science* **345**, 943-949.
- Lee, J. T. (2012). Epigenetic regulation by long noncoding RNAs. *Science* **338**, 1435-1439.
- Lewis, E. B. (1978). A gene complex controlling segmentation in *Drosophila*. *Nature* **276**, 565-570.
- Liu, K., Ding, L., Li, Y., Yang, H., Zhao, C., Lei, Y., Han, S., Tao, W., Miao, D., Steller, H. et al. (2014). Neuronal necrosis is regulated by a conserved chromatin-modifying cascade. *Proc. Natl. Acad. Sci. USA* **111**, 13960-13965.
- Margueron, R., Justin, N., Ohno, K., Sharpe, M. L., Son, J., Drury, W. J., III, Voigt, P., Martin, S. R., Taylor, W. R., De Marco, V. et al. (2009). Role of the polycomb protein EED in the propagation of repressive histone marks. *Nature* **461**, 762-767.
- Miyazaki, H., Higashimoto, K., Yada, Y., Endo, T. A., Sharif, J., Komori, T., Matsuda, M., Koseki, Y., Nakayama, M., Soejima, H. et al. (2013). Ash1 methylates Lys36 of histone H3 independently of transcriptional elongation to counteract polycomb silencing. *PLoS Genet.* **9**, e1003897.
- Mondal, T. and Kanduri, C. (2013). Maintenance of epigenetic information: a noncoding RNA perspective. *Chromosoma Res.* **21**, 615-625.
- Mulvey, B. B., Olcese, U., Cabrera, J. R. and Horabin, J. I. (2014). An interactive network of long non-coding RNAs facilitates the *Drosophila* sex determination decision. *Biochim. Biophys. Acta* **1839**, 773-784.
- Nowak, A. J., Alfieri, C., Stirnimann, C. U., Rybin, V., Baudin, F., Ly-Hartig, N., Lindner, D. and Müller, C. W. (2011). Chromatin-modifying complex component Nurf55/p55 associates with histones H3 and H4 and polycomb repressive complex 2 subunit Su(z)12 through partially overlapping binding sites. *J. Biol. Chem.* **286**, 23388-23396.
- O'Meara, M. M. and Simon, J. A. (2012). Inner workings and regulatory inputs that control Polycomb repressive complex 2. *Chromosoma* **121**, 221-234.
- Palazzo, A. F. and Lee, E. S. (2015). Non-coding RNA: what is functional and what is junk? *Front. Genet.* **6**, 2.
- Papp, B. and Müller, J. (2006). Histone trimethylation and the maintenance of transcriptional ON and OFF states by trxG and PcG proteins. *Genes Dev.* **20**, 2041-2054.
- Pérez, L., Barrio, L., Cano, D., Fiuza, U.-M., Muzzopappa, M. and Milán, M. (2011). Enhancer-PRE communication contributes to the expansion of gene expression domains in proliferating primordia. *Development* **138**, 3125-3134.
- Ponting, C. P. and Belgard, T. G. (2010). Transcribed dark matter: meaning or myth? *Hum. Mol. Genet.* **19**, R162-R168.
- Rinn, J. L. and Chang, H. Y. (2012). Genome regulation by long noncoding RNAs. *Annu. Rev. Biochem.* **81**, 145-166.
- Sabin, L. R., Delás, M. J. and Hannon, G. J. (2013). Dogma derailed: the many influences of RNA on the genome. *Mol. Cell* **49**, 783-794.
- Sauvageau, M. and Sauvageau, G. (2010). Polycomb group proteins: multi-faceted regulators of somatic stem cells and cancer. *Cell Stem Cell* **7**, 299-313.
- Scelfo, A., Piunti, A. and Pasini, D. (2015). The controversial role of the Polycomb group proteins in transcription and cancer: how much do we not understand Polycomb proteins? *FEBS J.* **282**, 1703-1722.
- Schmitges, F. W., Prusty, A. B., Faty, M., Stützer, A., Lingaraju, G. M., Aiwanian, J., Sack, R., Hess, D., Li, L., Zhou, S. et al. (2011). Histone methylation by PRC2 is inhibited by active chromatin marks. *Mol. Cell* **42**, 330-341.
- Schuettengruber, B., Martínez, A.-M., Iovino, N. and Cavalli, G. (2011). Trithorax group proteins: switching genes on and keeping them active. *Nat. Rev. Mol. Cell Biol.* **12**, 799-814.
- Schwartz, Y. B. and Pirrotta, V. (2013). A new world of Polycombs: unexpected partnerships and emerging functions. *Nat. Rev. Genet.* **14**, 853-864.
- Schwartz, Y. B., Kahn, T. G., Stenberg, P., Ohno, K., Bourgon, R. and Pirrotta, V. (2010). Alternative epigenetic chromatin states of polycomb target genes. *PLoS Genet.* **6**, e1000805.
- Shilatifard, A. (2012). The COMPASS family of histone H3K4 methylases: mechanisms of regulation in development and disease pathogenesis. *Annu. Rev. Biochem.* **81**, 65-95.
- Simon, J. A. and Kingston, R. E. (2013). Occupying chromatin: Polycomb mechanisms for getting to genomic targets, stopping transcriptional traffic, and staying put. *Mol. Cell* **49**, 808-824.
- Srinivasan, S., Dorigi, K. M. and Tamkun, J. W. (2008). *Drosophila* Kismet regulates histone H3 lysine 27 methylation and early elongation by RNA polymerase II. *PLoS Genet.* **4**, e1000217.
- Steffen, P. A. and Ringrose, L. (2014). What are memories made of? How Polycomb and Trithorax proteins mediate epigenetic memory. *Nat. Rev. Mol. Cell Biol.* **15**, 340-356.
- Tanaka, Y., Katagiri, Z.-I., Kawahashi, K., Kioussis, D. and Kitajima, S. (2007). Trithorax-group protein ASH1 methylates histone H3 lysine 36. *Gene* **397**, 161-168.
- Tavares, L., Dimitrova, E., Oxley, D., Webster, J., Poot, R., Demmers, J., Bezstarosti, K., Taylor, S., Ura, H., Koide, H. et al. (2012). RYBP-PRC1

- complexes mediate H2A ubiquitylation at polycomb target sites independently of PRC2 and H3K27me3. *Cell* **148**, 664-678.
- Thiel, A. T., Feng, Z., Pant, D. K., Chodosh, L. A. and Hua, X.** (2013). The trithorax protein partner menin acts in tandem with EZH2 to suppress C/EBP $\alpha$  and differentiation in MLL-AF9 leukemia. *Haematologica* **98**, 918-927.
- Tie, F., Banerjee, R., Saiakhova, A. R., Howard, B., Monteith, K. E., Scacheri, P. C., Cosgrove, M. S. and Harte, P. J.** (2014). Trithorax monomethylates histone H3K4 and interacts directly with CBP to promote H3K27 acetylation and antagonize Polycomb silencing. *Development* **141**, 1129-1139.
- Voigt, P., Tee, W.-W. and Reinberg, D.** (2013). A double take on bivalent promoters. *Genes Dev.* **27**, 1318-1338.
- Wang, L., Brown, J. L., Cao, R., Zhang, Y., Kassis, J. A. and Jones, R. S.** (2004). Hierarchical recruitment of polycomb group silencing complexes. *Mol. Cell* **14**, 637-646.
- Wang, K. C., Yang, Y. W., Liu, B., Sanyal, A., Corces-Zimmerman, R., Chen, Y., Lajoie, B. R., Protacio, A., Flynn, R. A., Gupta, R. A. et al.** (2011). A long noncoding RNA maintains active chromatin to coordinate homeotic gene expression. *Nature* **472**, 120-124.
- Wen, P., Quan, Z. and Xi, R.** (2012). The biological function of the WD40 repeat-containing protein p55/Caf1 in *Drosophila*. *Dev. Dyn.* **241**, 455-464.
- Yang, Y. W., Flynn, R. A., Chen, Y., Qu, K., Wan, B., Wang, K. C., Lei, M. and Chang, H. Y.** (2014). Essential role of lncRNA binding for WDR5 maintenance of active chromatin and embryonic stem cell pluripotency. *Elife* **3**, e02046.
- Yuan, W., Xu, M., Huang, C., Liu, N., Chen, S. and Zhu, B.** (2011). H3K36 methylation antagonizes PRC2-mediated H3K27 methylation. *J. Biol. Chem.* **286**, 7983-7989.
